# Supplementary material for: Dissolution–precipitation synthesis and thermal stability of magnesium whitlockite
Source: Royal Society of Chemistry journal article supplement (doi:10.1039/d3ce00602f), 2023-01-01
Supplement: d3ce00602f1.pdf [file d3ce00602f1.pdf]

## Supplementary information

# Dissolution-Precipitation Synthesis and Thermal Stability of Magnesium Whitlockite

Agne Kizalaite<sup>1</sup>, Vytautas Klimavicius<sup>2</sup>, Vytautas Balevicius<sup>2</sup>, Gediminas Niaura<sup>2</sup>,  
Andrei N. Salak<sup>3</sup>, Jen-Chang Yang<sup>4</sup>, Sung Hun Cho<sup>5</sup>, Tomoyo Goto<sup>5,6</sup>, Tohru Sekino<sup>5</sup>,  
Aleksej Zarkov<sup>1,\*</sup>

<sup>1</sup>*Institute of Chemistry, Vilnius University, Naugarduko 24, LT-03225 Vilnius, Lithuania*

<sup>2</sup>*Institute of Chemical Physics, Vilnius University, Sauletekio 3, LT-10257 Vilnius, Lithuania*

<sup>3</sup>*Department of Materials and Ceramics Engineering/CICECO-Aveiro Institute of Materials,  
University of Aveiro, 3810-193 Aveiro, Portugal*

<sup>4</sup>*Graduate Institute of Nanomedicine and Medical Engineering, College of Biomedical Engineering,  
Taipei Medical University, 250 Wu-Hsing St., Taipei 11052, Taiwan*

<sup>5</sup>*SANKEN (The Institute of Scientific and Industrial Research), Osaka University, 8-1 Mihogaoka,  
Ibaraki, Osaka 567-0047, Japan*

<sup>6</sup>*Institute for Advanced Co-Creation Studies, Osaka University, 1-1 Yamadaoka, Suita, Osaka 565-  
0871, Japan*

\*Author to whom correspondence should be addressed.

Aleksej Zarkov: e-mail: [aleksej.zarkov@chf.vu.lt](mailto:aleksej.zarkov@chf.vu.lt)

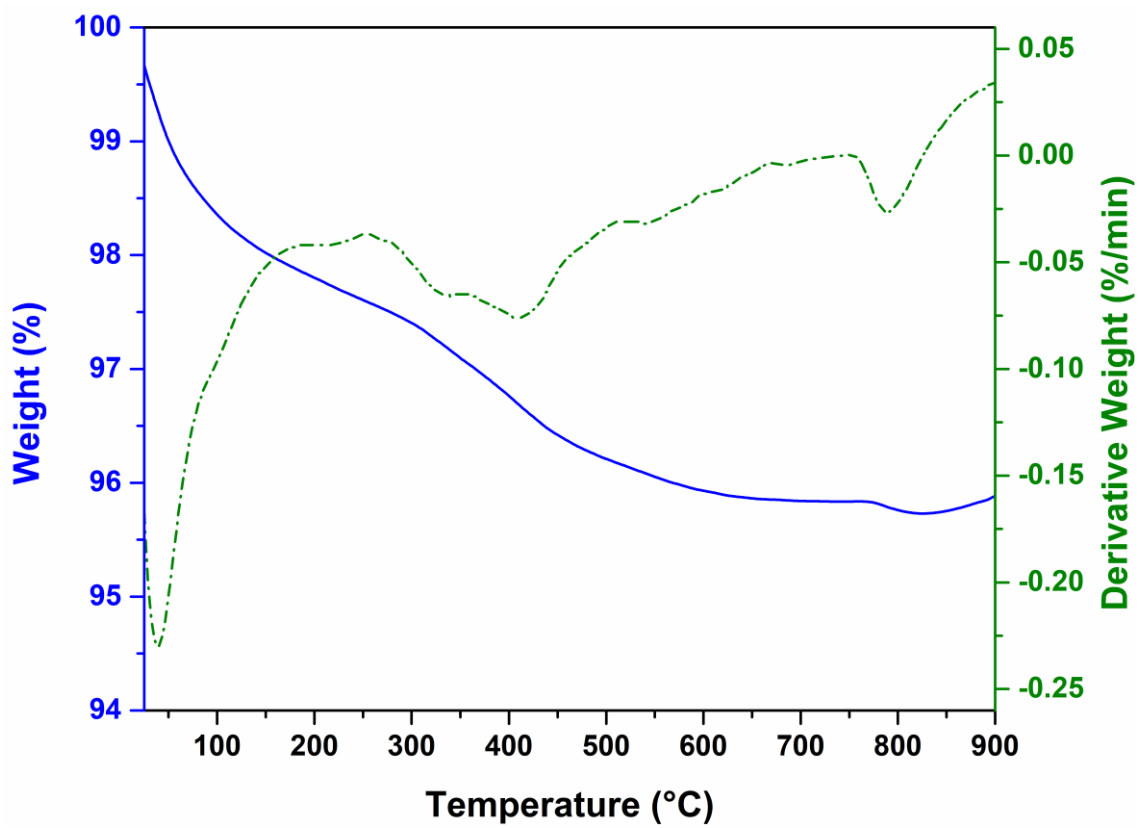

**Figure S1.** TG/DTG curves of as-prepared Mg-WH powder.

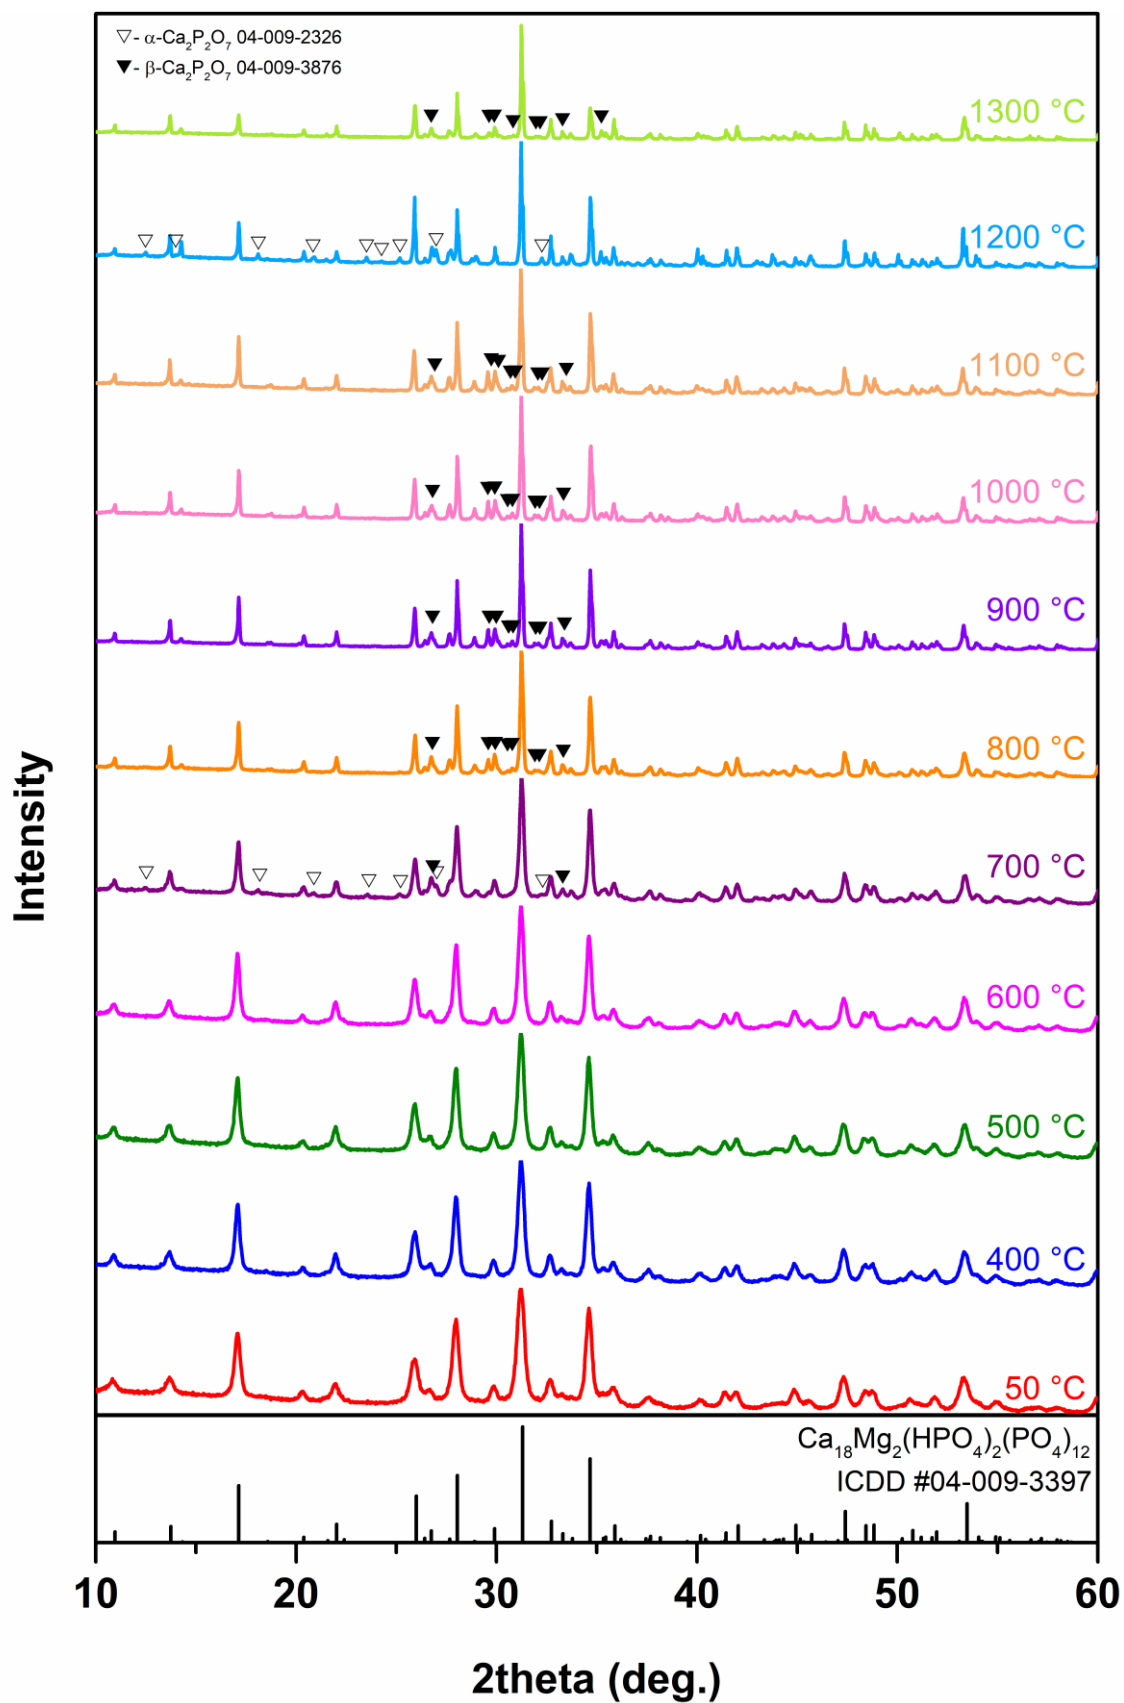

Figure S2. XRD patterns of Mg-WH powders annealed at different temperatures.

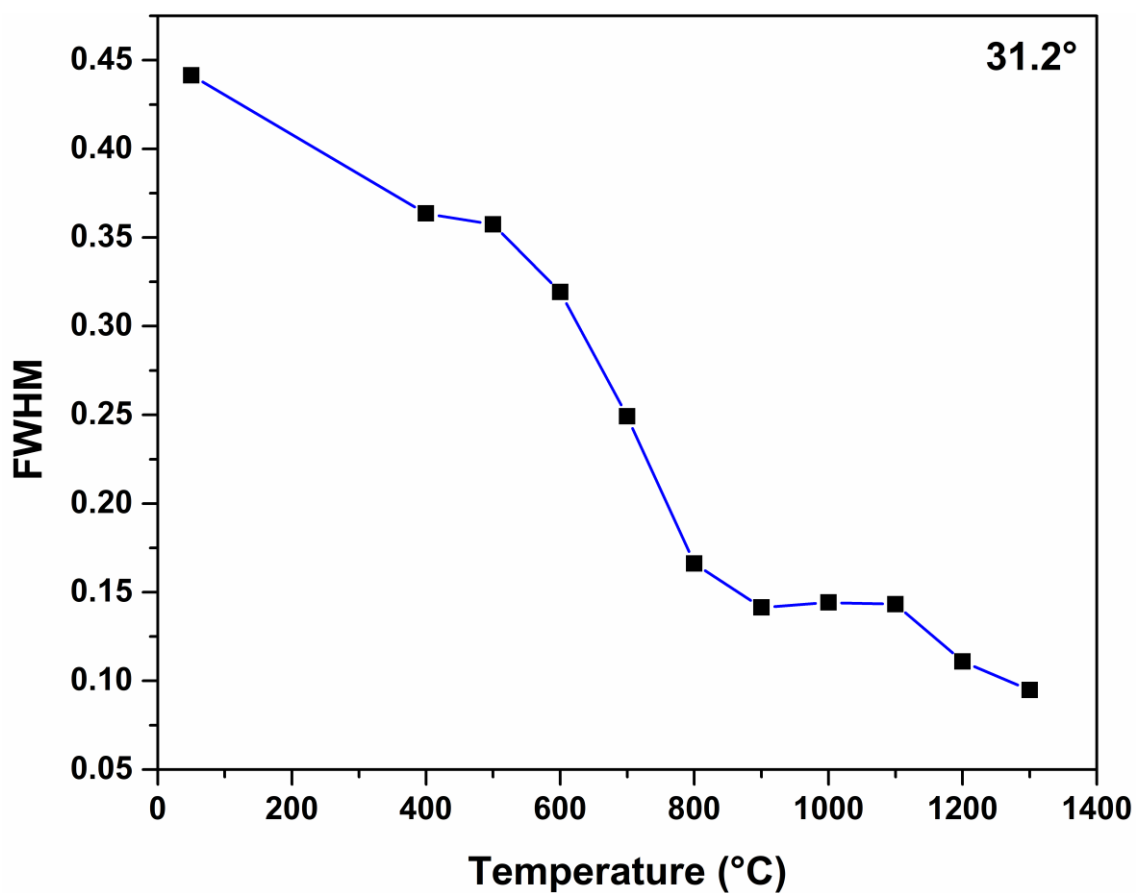

**Figure S3.** FWHM of (2010) peak of Mg-WH/ $\beta$ -TCP powders annealed at different temperatures.

**Table S1.** Results of Rietveld refinement of Mg-WH powders annealed at different temperatures.

| Temperature, °C | $a$ , Å    | Standard deviation, Å | $c$ , Å    | Standard deviation, Å | $\chi^2$ |
|-----------------|------------|-----------------------|------------|-----------------------|----------|
| 50              | 10.348(74) | 0.00045               | 37.15(349) | 0.00167               | 1.91     |
| 600             | 10.349(40) | 0.00030               | 37.13(499) | 0.00109               | 1.52     |
| 700             | 10.336(71) | 0.00026               | 37.13(620) | 0.00100               | 1.92     |
| 800             | 10.333(89) | 0.00018               | 37.15(524) | 0.00070               | 2.57     |
| 900             | 10.329(56) | 0.00012               | 37.17(502) | 0.00050               | 2.90     |
| 1000            | 10.327(44) | 0.00015               | 37.20(289) | 0.00062               | 3.12     |
| 1100            | 10.325(05) | 0.00013               | 37.21(154) | 0.00055               | 2.71     |
| 1200            | 10.328(19) | 0.00016               | 37.19(312) | 0.00057               | 6.60     |
| 1300            | 10.332(03) | 0.00011               | 37.15(300) | 0.00060               | 9.50     |

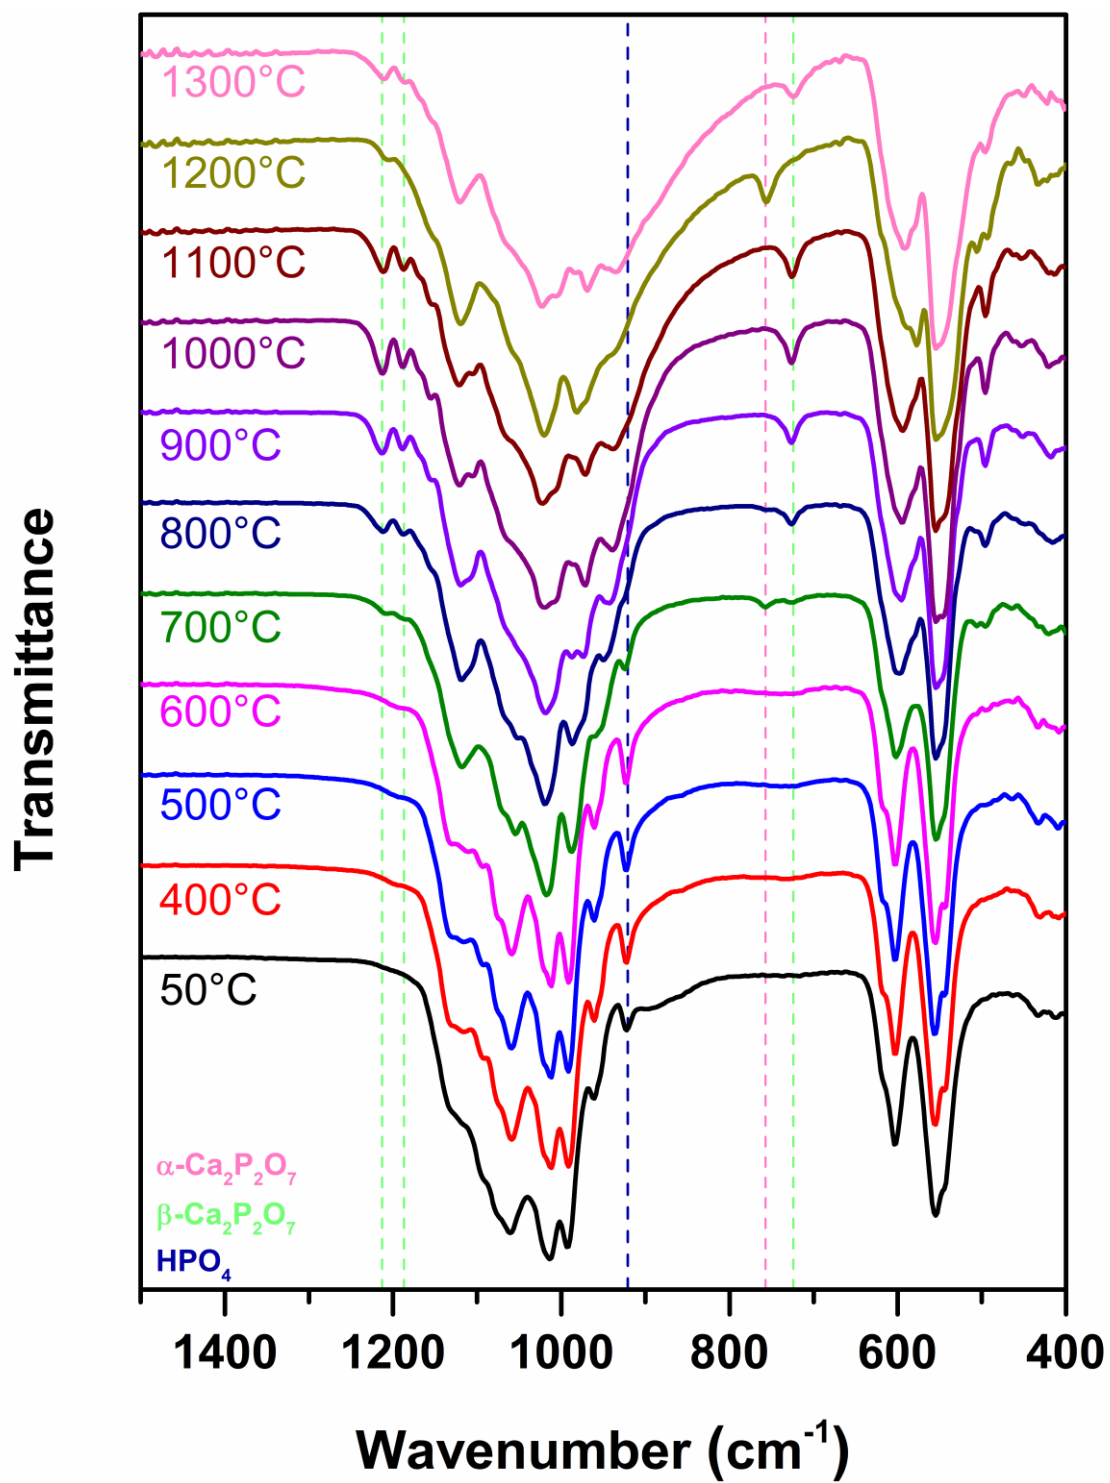

Figure S4. FTIR spectra of Mg-WH powders annealed at different temperatures.

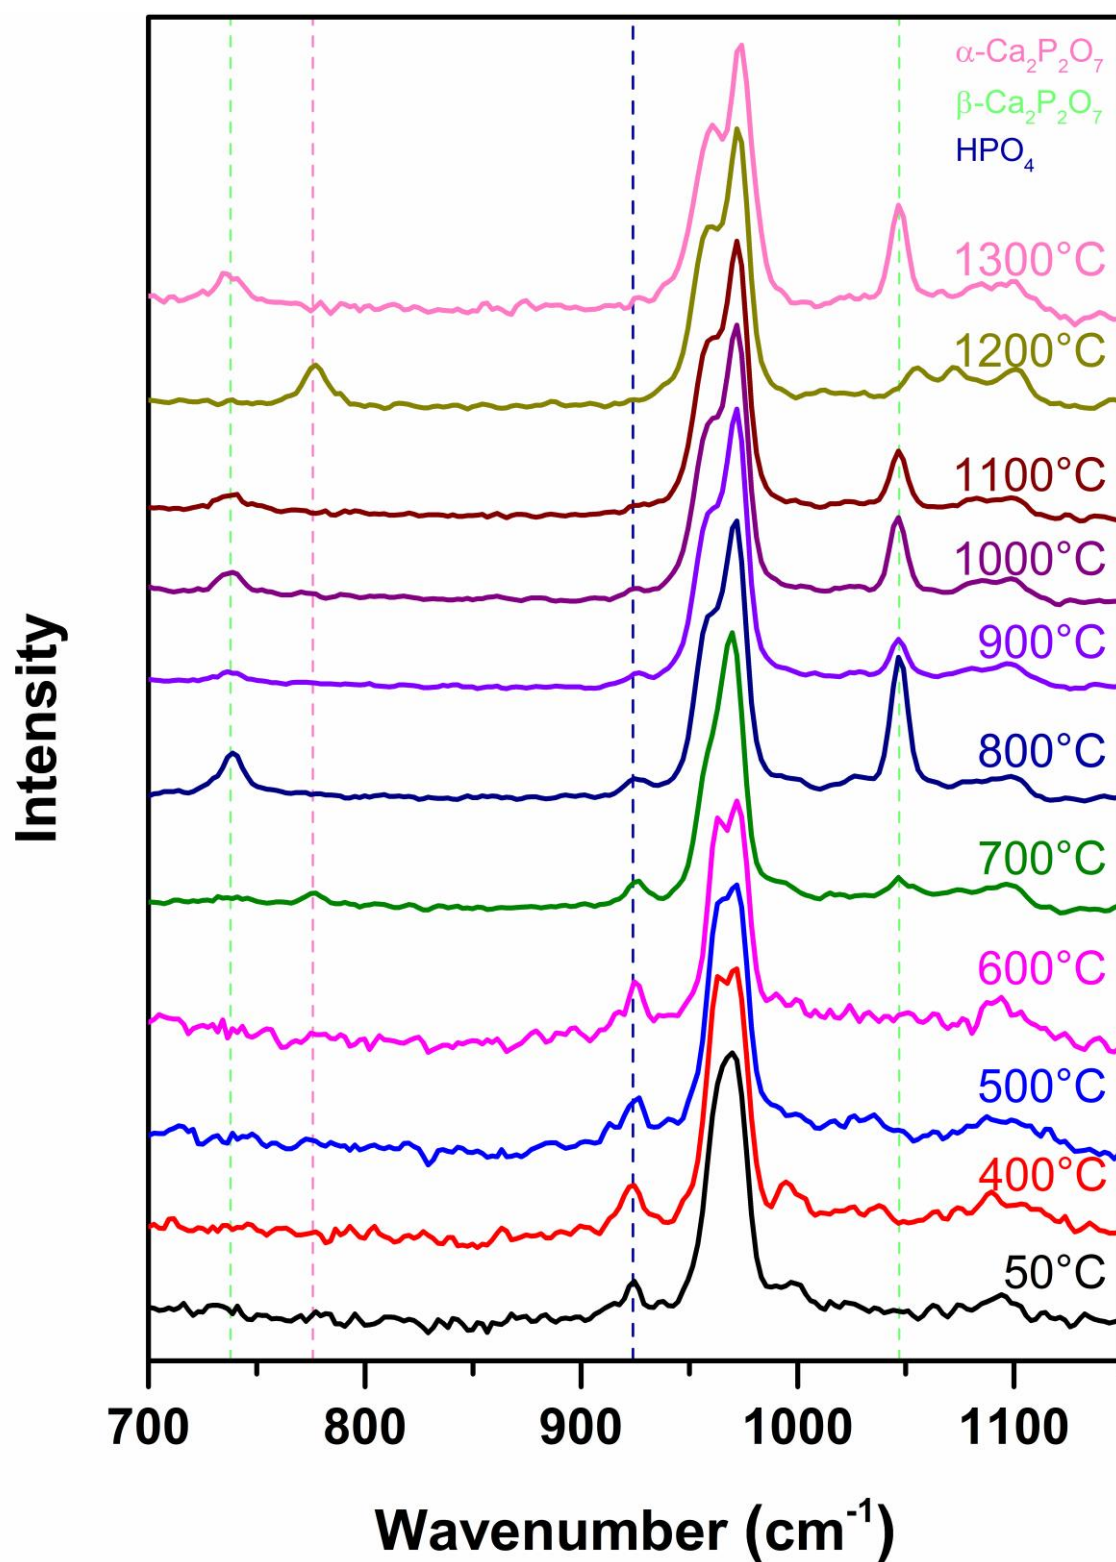

**Figure S5.** Raman spectra of Mg-WH powders annealed at different temperatures (excitation wavelength 325 nm).

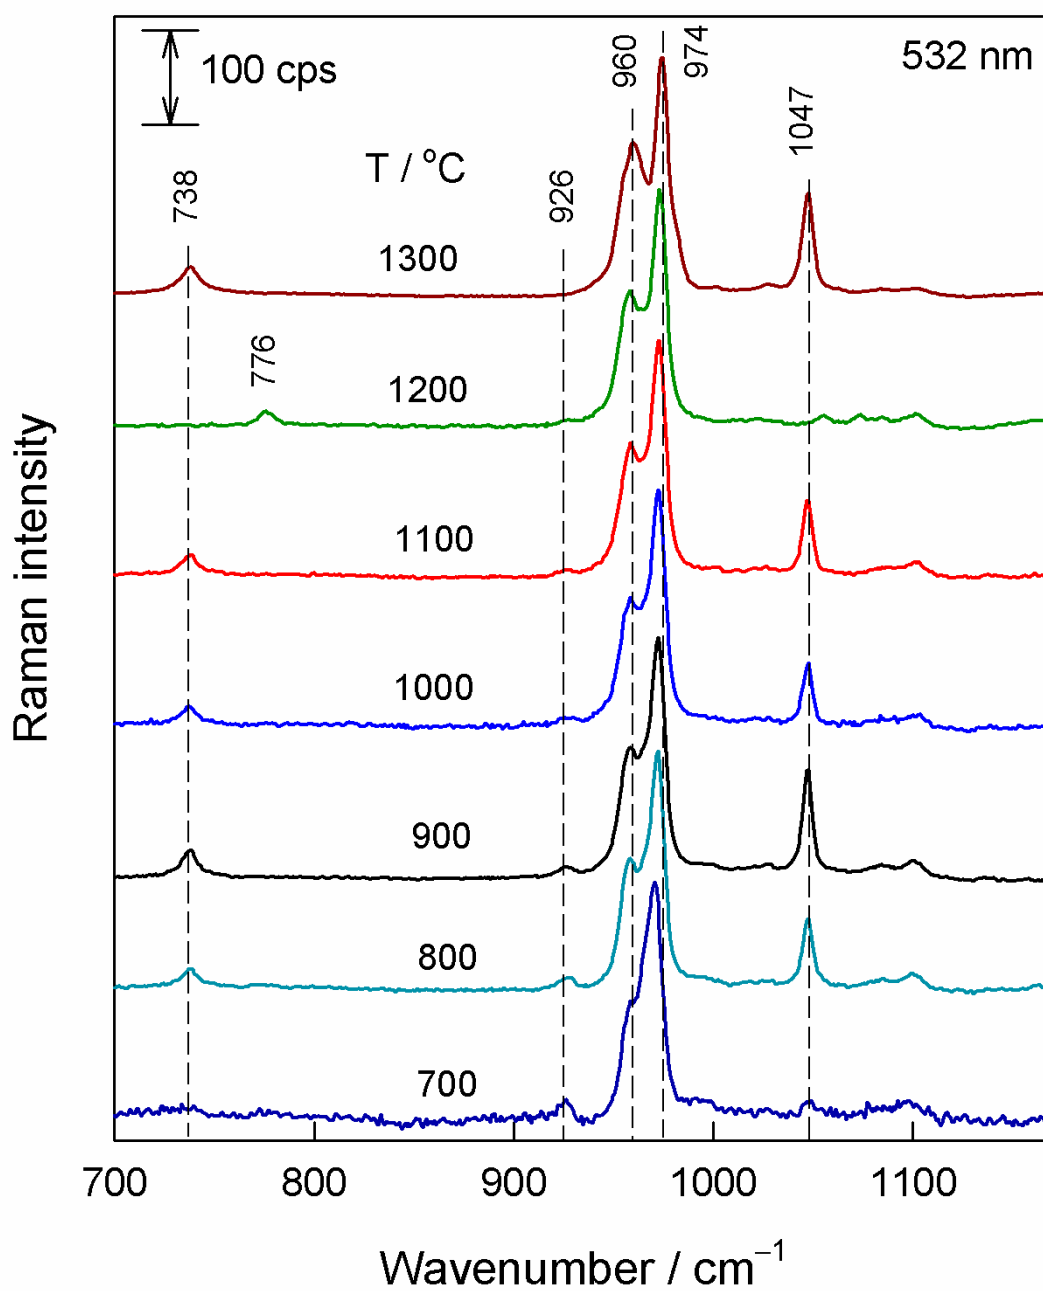

**Figure S6.** Raman spectra of Mg-WH powders annealed at different temperatures (excitation wavelength 532 nm).
